# Supplementary material
Source: publisher figshare collection journal article supplement (https://diabetesjournals.figshare.com/articles/dataset/_/23063396)
Supplement: Supplementary file 1 [file 1]

## **Supplementary Online Content**

### **Common and distinct genetic architecture of age at diagnosis of diabetes in South Indian and European populations**

Sundararajan Srinivasan<sup>1</sup>, Samuel Liju<sup>2</sup>, Natarajan Sathish<sup>2</sup>, Moneeza K Siddiqui<sup>1</sup>, Ranjit Mohan Anjana<sup>2</sup>, Ewan R. Pearson<sup>1</sup>, Alexander S.F. Doney<sup>1</sup>, Viswanathan Mohan MD<sup>2</sup>, Venkatesan Radha<sup>2</sup>, Colin N.A Palmer<sup>1\*</sup>

<sup>1</sup> Division of Population Health and Genomics, Ninewells Hospital and School of Medicine, University of Dundee, Dundee, DD1 9SY, United Kingdom.

<sup>2</sup> Madras Diabetes Research Foundation and Dr Mohan's Diabetes Specialities Centre, Chennai, India

**Short title:** GWAS of Age at diagnosis of Type 2 diabetes.

#### **ADDRESS FOR CORRESPONDENCE:**

Professor Colin NA. Palmer

Email: c.n.a.palmer@dundee.ac.uk.

Phone +44 1382 383155

Division of Population Health and Genomics, Ninewells Hospital and Medical School, University of Dundee, United Kingdom.

Supplementary Tables 5

Supplementary Figures 13

**Supplementary Table S1. Characteristics of the study population.**

| Study Cohort | N      | Age at Diagnosis/ Onset<br>mean age in years ± SD | BMI  | Gender<br>Male: Female<br>(%) | Ethnicity        |
|--------------|--------|---------------------------------------------------|------|-------------------------------|------------------|
| DMDSC 1      | 5,801  | 41.7±10.17                                        | 26.3 | 61.5;38.5                     | South<br>Indians |
| DMDSC 2      | 2,494  | 41.3±9.77                                         | 26.3 | 58.17;41.8                    | South<br>Indians |
| UKBB         | 808    | 50.1±11.2                                         | 28.7 | 73.7;26.3                     | South<br>Asians  |
| GoDARTS      | 6,999  | 59±10.12                                          | 31   | 54.9;44.8                     | Europeans        |
| GoSHARE      | 4,155  | 58.2±10.5                                         | 31.6 | 53.5;46.4                     | Europeans        |
| UKBB         | 13,744 | 54.6±10.6                                         | 32   | 69.5;36.3                     | Europeans        |

**Supplementary Table S2. STROBE Statements and Checklist**

STROBE Statement—Checklist of items that should be included in reports of *cohort studies*

|                              | Item No | Checklist | Recommendation                                                                                                                                                                                    |
|------------------------------|---------|-----------|---------------------------------------------------------------------------------------------------------------------------------------------------------------------------------------------------|
| <b>Title and abstract</b>    | 1       | ×         | (a) Indicate the study's design with a commonly used term in the title or the abstract                                                                                                            |
|                              |         | ×         | (b) Provide in the abstract an informative and balanced summary of what was done and what was found                                                                                               |
| <b>Introduction</b>          |         |           |                                                                                                                                                                                                   |
| Background/rationale         | 2       | ×         | Explain the scientific background and rationale for the investigation being reported                                                                                                              |
| Objectives                   | 3       | ×         | State specific objectives, including any prespecified hypotheses                                                                                                                                  |
| <b>Methods</b>               |         |           |                                                                                                                                                                                                   |
| Study design                 | 4       | ×         | Present key elements of study design early in the paper                                                                                                                                           |
| Setting                      | 5       | ×         | Describe the setting, locations, and relevant dates, including periods of recruitment, exposure, follow-up, and data collection                                                                   |
| Participants                 | 6       | ×         | (a) Give the eligibility criteria, and the sources and methods of selection of participants. Describe methods of follow-up                                                                        |
|                              |         |           | (b) For matched studies, give matching criteria and number of exposed and unexposed                                                                                                               |
| Variables                    | 7       | ×         | Clearly define all outcomes, exposures, predictors, potential confounders, and effect modifiers. Give diagnostic criteria, if applicable                                                          |
| Data sources/<br>measurement | 8*      | ×         | For each variable of interest, give sources of data and details of methods of assessment (measurement). Describe comparability of assessment methods if there is more than one group              |
| Bias                         | 9       | ×         | Describe any efforts to address potential sources of bias                                                                                                                                         |
| Study size                   | 10      | ×         | Explain how the study size was arrived at                                                                                                                                                         |
| Quantitative variables       | 11      | ×         | Explain how quantitative variables were handled in the analyses. If applicable, describe which groupings were chosen and why                                                                      |
| Statistical methods          | 12      | ×         | (a) Describe all statistical methods, including those used to control for confounding                                                                                                             |
|                              |         | ×         | (b) Describe any methods used to examine subgroups and interactions                                                                                                                               |
|                              |         | ×         | (c) Explain how missing data were addressed                                                                                                                                                       |
|                              |         | NA        | (d) If applicable, explain how loss to follow-up was addressed                                                                                                                                    |
|                              |         | ×         | (e) Describe any sensitivity analyses                                                                                                                                                             |
| <b>Results</b>               |         |           |                                                                                                                                                                                                   |
| Participants                 | 13*     | ×         | (a) Report numbers of individuals at each stage of study—eg numbers potentially eligible, examined for eligibility, confirmed eligible, included in the study, completing follow-up, and analysed |
|                              |         | ×         | (b) Give reasons for non-participation at each stage                                                                                                                                              |
|                              |         | ×         | (c) Consider use of a flow diagram                                                                                                                                                                |
| Descriptive data             | 14*     | ×         | (a) Give characteristics of study participants (eg demographic, clinical, social) and information on exposures and potential confounders                                                          |

|                                     |     |    |                                                                                                                                                                                                              |
|-------------------------------------|-----|----|--------------------------------------------------------------------------------------------------------------------------------------------------------------------------------------------------------------|
|                                     |     | NA | (b) Indicate number of participants with missing data for each variable of interest                                                                                                                          |
|                                     |     | NA | (c) Summarise follow-up time (eg, average and total amount)                                                                                                                                                  |
| Outcome data                        | 15* | NA | Report numbers of outcome events or summary measures over time                                                                                                                                               |
| Main results                        | 16  | ×  | (a) Give unadjusted estimates and, if applicable, confounder-adjusted estimates and their precision (eg, 95% confidence interval). Make clear which confounders were adjusted for and why they were included |
|                                     |     | ×  | (b) Report category boundaries when continuous variables were categorized                                                                                                                                    |
|                                     |     | ×  | (c) If relevant, consider translating estimates of relative risk into absolute risk for a meaningful time period                                                                                             |
| Other analyses                      | 17  | ×  | Report other analyses done—eg, analyses of subgroups and interactions, and sensitivity analyses                                                                                                              |
| <b>Discussion</b>                   |     |    |                                                                                                                                                                                                              |
| Key results                         | 18  | ×  | Summarise key results with reference to study objectives                                                                                                                                                     |
| Limitations                         | 19  | ×  | Discuss limitations of the study, taking into account sources of potential bias or imprecision. Discuss both direction and magnitude of any potential bias                                                   |
| Interpretation                      | 20  | ×  | Give a cautious overall interpretation of results considering objectives, limitations, multiplicity of analyses, results from similar studies, and other relevant evidence                                   |
| Generalisability                    | 21  | ×  | Discuss the generalisability (external validity) of the study results                                                                                                                                        |
| <b>Other information</b><br>Funding | 22  | ×  | Give the source of funding and the role of the funders for the present study and, if applicable, for the original study on which the present article is based                                                |

**Supplementary Table S3. Summary statistics of the novel variants after conditioning on index SNPs**

| SNP         | CHR | POS       | EA/NEA | BETA | SE  | P value               | EAf   | Gene   |
|-------------|-----|-----------|--------|------|-----|-----------------------|-------|--------|
| rs570193324 | 10  | 114925065 | T/C    | 9.8  | 2.3 | $3.2 \times 10^{-05}$ | 0.002 | TCF7L2 |
| rs143316471 | 06  | 20693278  | T/C    | -5.3 | 2.3 | 0.0054                | 0.003 | CDKALI |

**Supplementary Table S4. Summary statistics of the novel variants in DMDSC cohort after adjusting for BMI**

| SNP                | Study Cohort        | Sample Size N | BETA (unadjusted) | BETA (adjusted BMI) | SE   | EAf  | P value (unadjusted)  | P value (Adjusted BMI) |
|--------------------|---------------------|---------------|-------------------|---------------------|------|------|-----------------------|------------------------|
| rs7903146 (TCF7L2) | DMDSC data freeze 1 | 5801          | -1.26             | -1.26               | 0.20 | 0.35 | $1 \times 10^{-10}$   | $1.0 \times 10^{-09}$  |
| rs9368219 (CDKALI) | DMDSC data freeze 1 | 5801          | -1.20             | -1.18               | 0.21 | 0.25 | $4.3 \times 10^{-08}$ | $4.0 \times 10^{-08}$  |

**Supplementary Table S5. Proportion of individuals in DMSC under different age groups used in this study**

| Age group T2D (Years) | DMDSC 1      | DMDSC 2     |
|-----------------------|--------------|-------------|
| < 20                  | 0            | 0           |
| >20 & < 30            | 912 (15.8%)  | 460 (18.5%) |
| > 30 & < 40           | 1582 (27.2%) | 657 (26.3%) |
| > 40 & < 55           | 2697 (46.5%) | 985 (39.5%) |
| > 55                  | 610 (10.5%)  | 392 (15.7%) |

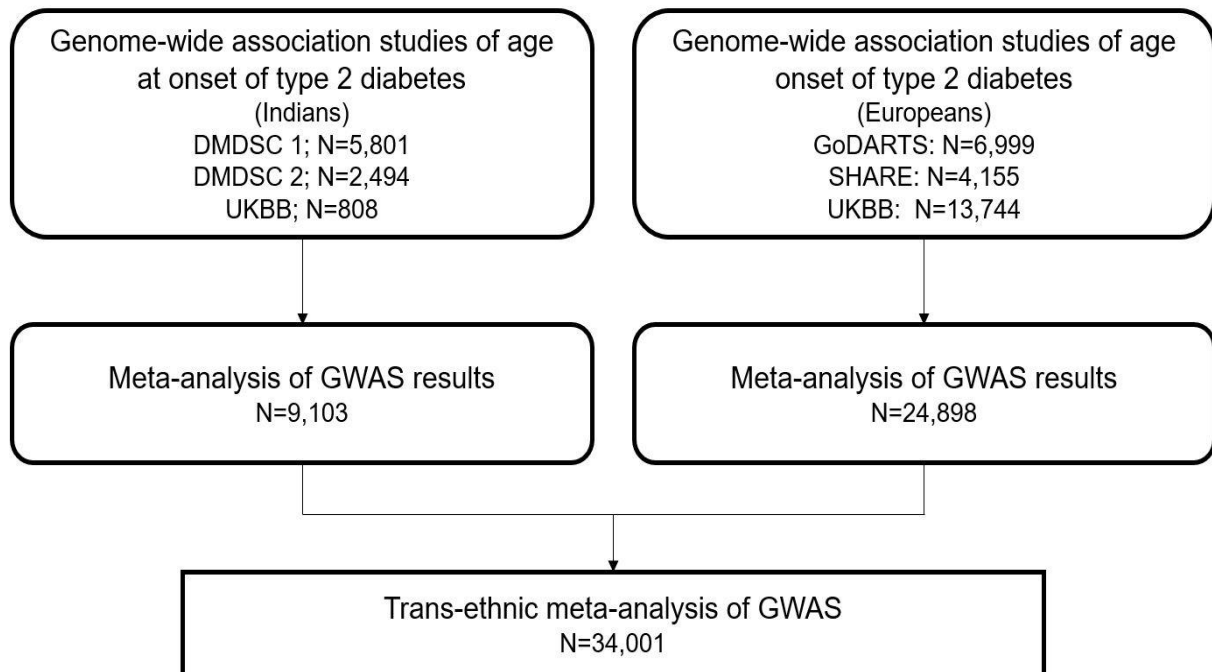

**Supplementary Figure S1. Study Design.**

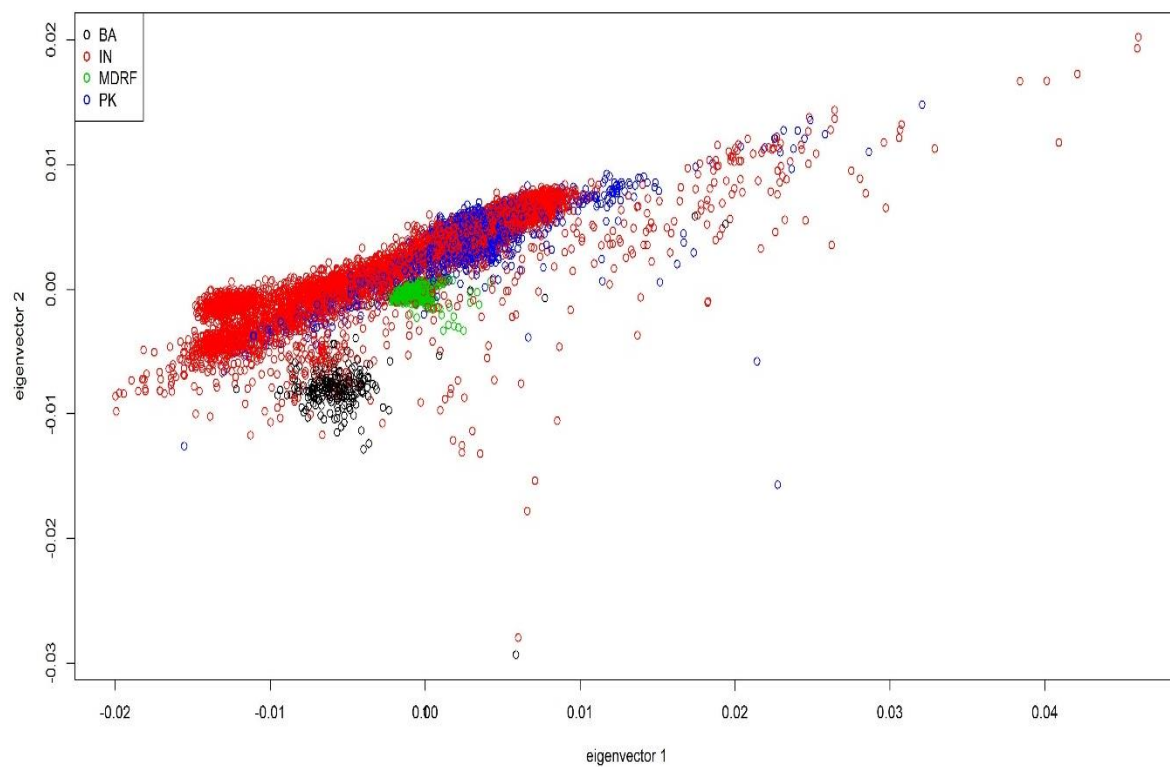

**Supplementary Figure S 2. PCA with the UKKB South Asians and South Indians from DMSDC (Formerly MDRF). BA Bangladeshi; IN Indians & PK Pakistani in UK biobank.**

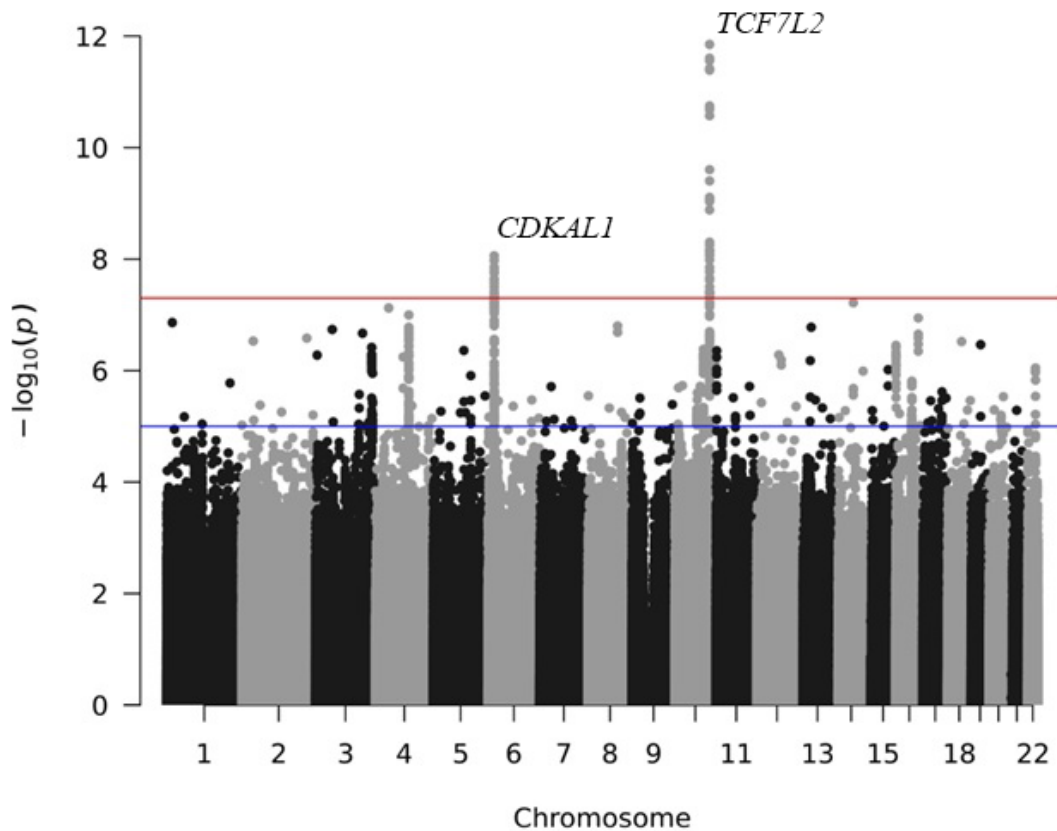

**Supplementary Figure S 3. Manhattan plot showing the P-value of association tests for SNPs with Age at diagnosis of T2D in a Trans ethnic meta-analysis of GWAS.** Two horizontal lines from the bottom indicate the suggestive ( $P < 5 \times 10^{-5}$ ) and genome-wide significance threshold ( $P < 5 \times 10^{-8}$ ), respectively. The X-axis represents the physical position and the 22 autosomal chromosomes; Y-axis represents the negative logarithm of association p-value. Each dot on the plot represents millions of imputed SNPs across the whole genome.



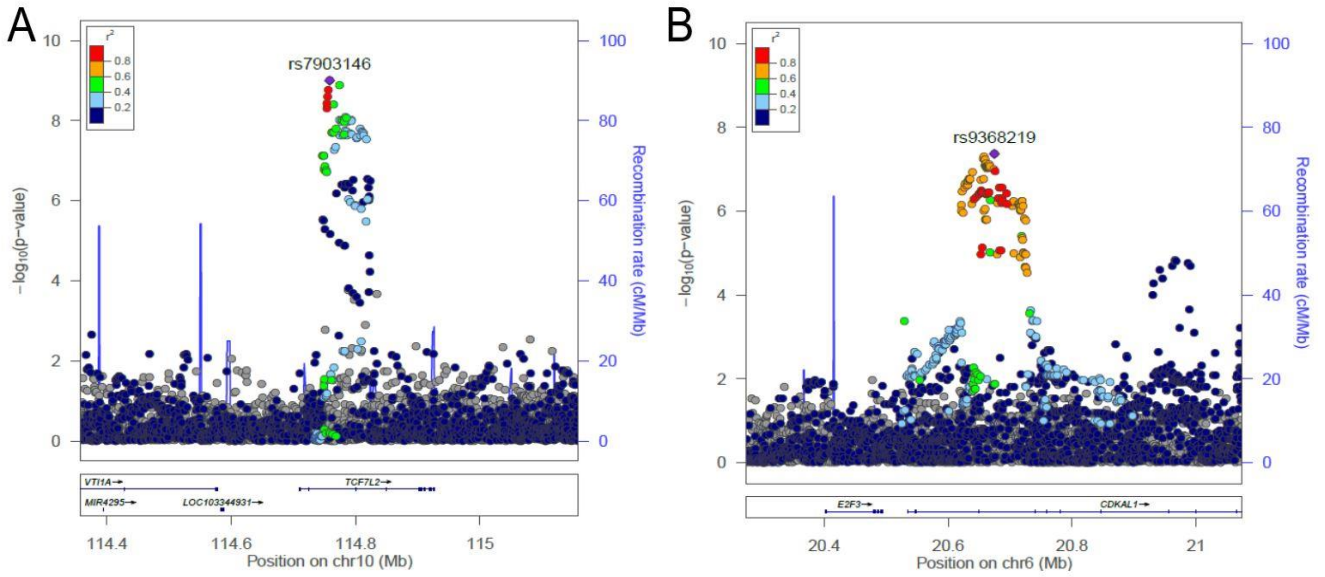

**Supplementary Figure S 4. Regional association plots of top significant SNPs.** Associations at TCF7L2 (A) and CDKAL1 (B) in the South Asian meta-genome-wide association studies. Chr, chromosome; cM/Mb, centimorgan/megabase (genomic location in reference build 37 [Hg19]).

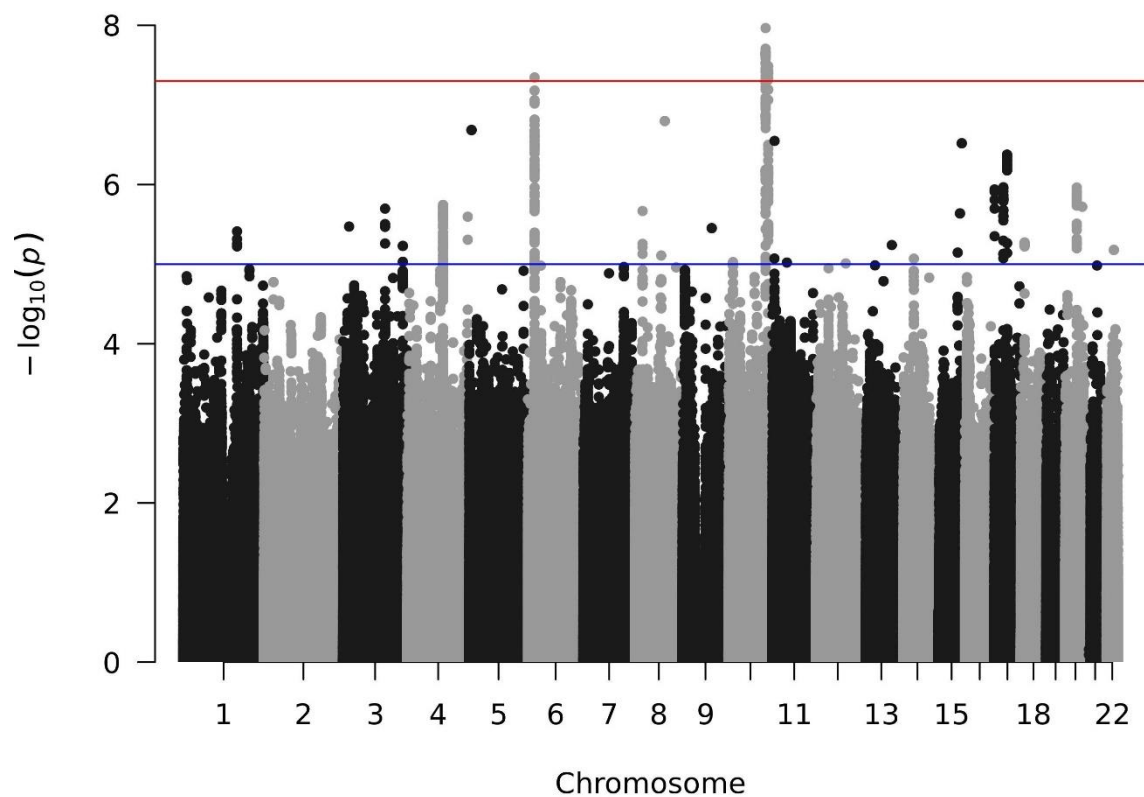

**Supplementary Figure S 5. Manhattan plot of genome-wide meta-analysis of South Asians.** It is showing the P-value of association tests for SNPs with possible Age at Onset of T2D in overall Trans ethnic meta-analysis of GWAS. Two horizontal lines from the bottom indicate the suggestive ( $P < 5 \times 10^{-5}$ ) and genome-wide significance threshold ( $P < 5 \times 10^{-8}$ ), respectively. The X-axis represents the physical position and the 22 autosomal chromosomes; Y-axis represents the negative logarithm of association p-value. Each dot on the plot represents millions of imputed SNPs across the whole genome. Top hits mapped to nearby genes are labelled.

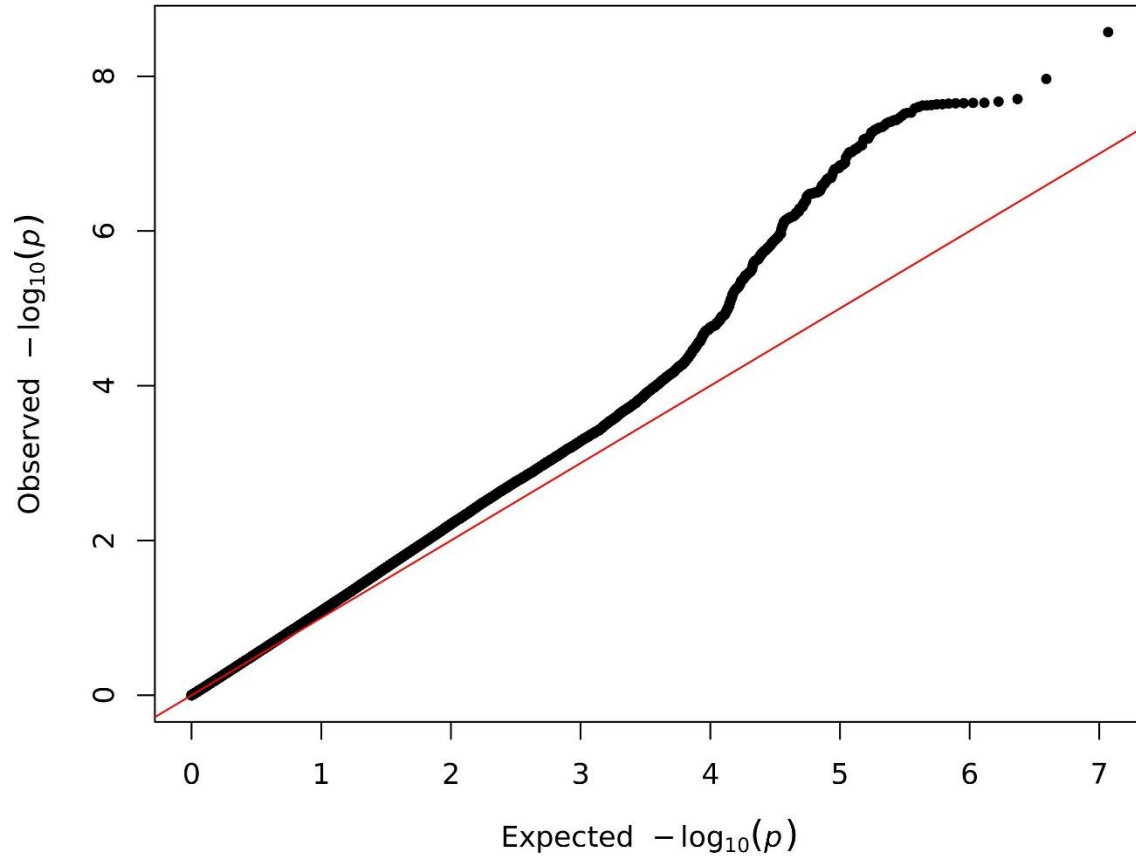

**Supplementary Figure S 6. Quantile-Quantile plot of genome-wide trans-ethnic meta-analysis of South Asians.**

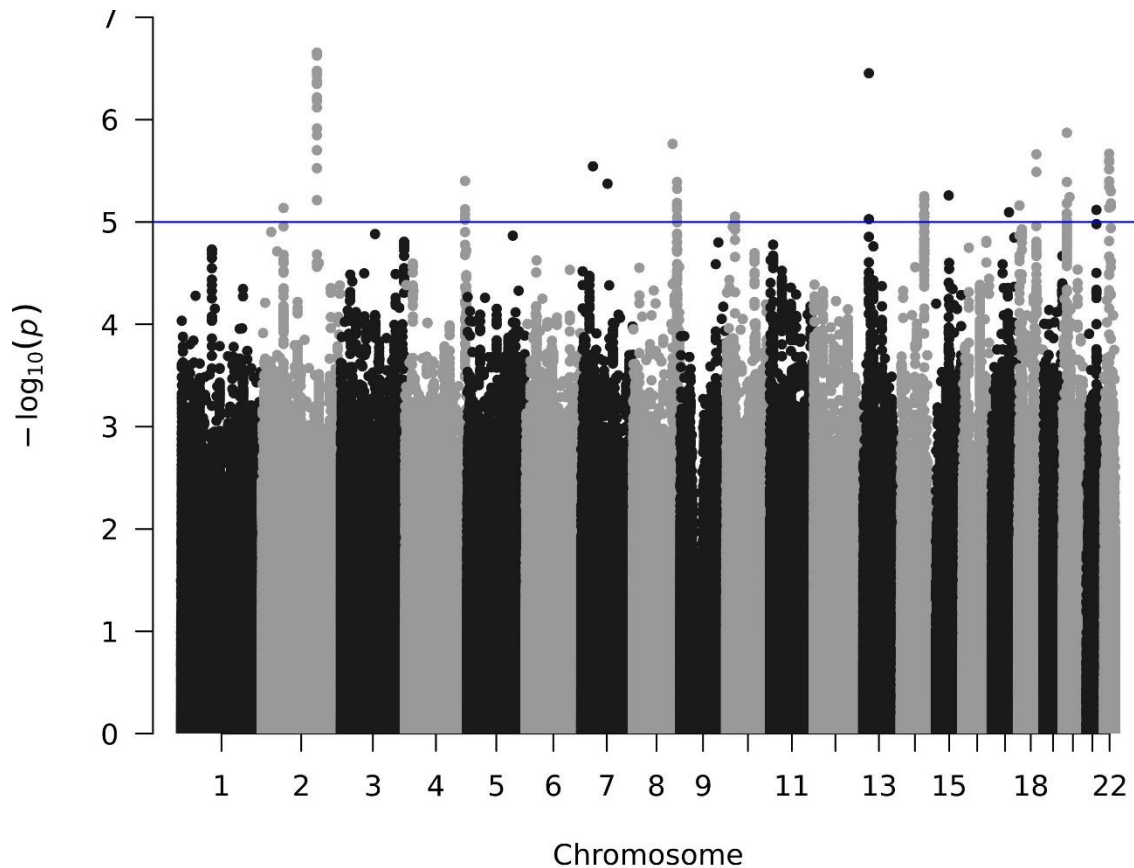

**Supplementary Figure S 7. Manhattan plot of genome-wide trans meta-analysis of Europeans.** It is showing the P-value of association tests for SNPs with possible age at onset of T2D in overall trans ethnic meta-analysis of GWAS. The horizontal lines from the bottom indicate the suggestive ( $P < 5 \times 10^{-5}$ ). The X-axis represents the physical position and the 22 autosomal chromosomes; Y-axis represents the negative logarithm of association p-value. Each dot on the plot represents millions of imputed SNPs across the whole genome. Top hits mapped to nearby genes are labelled.

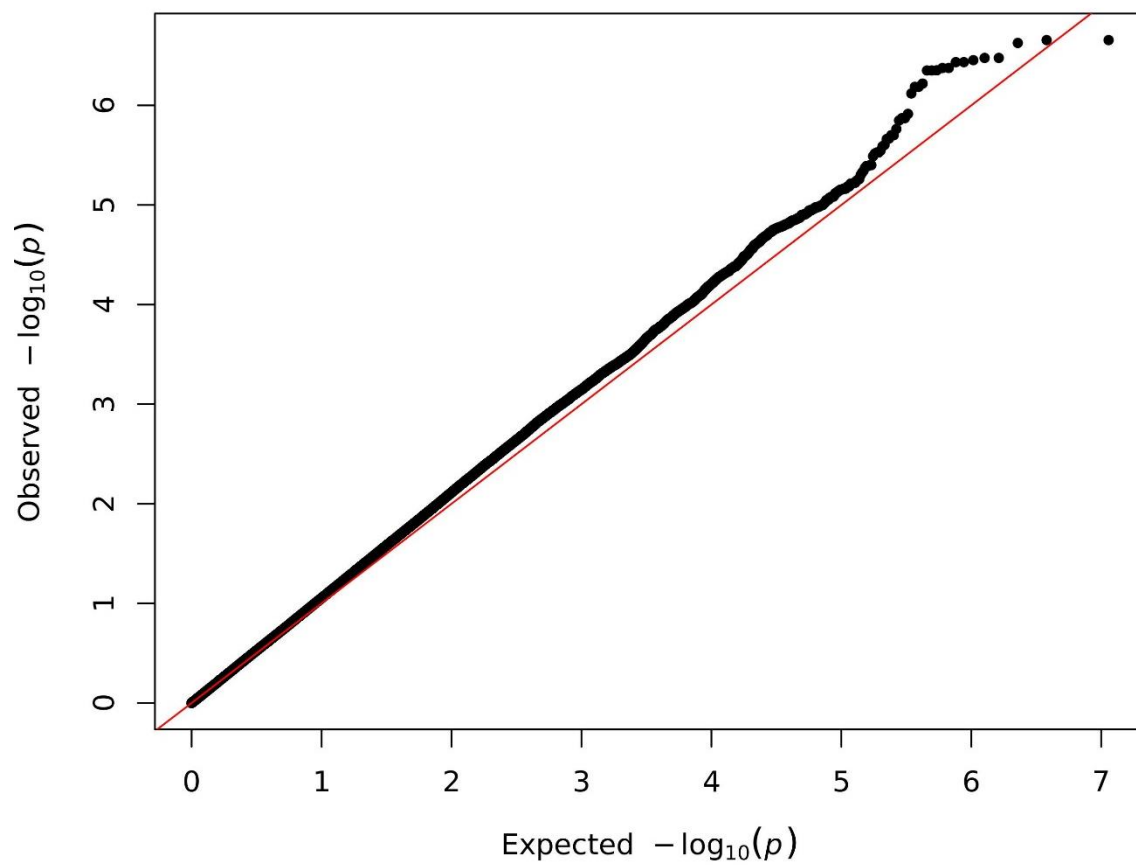

**Supplementary Figure S 8. Quantile-Quantile plot of genome-wide trans-ethnic meta-analysis of Europeans**

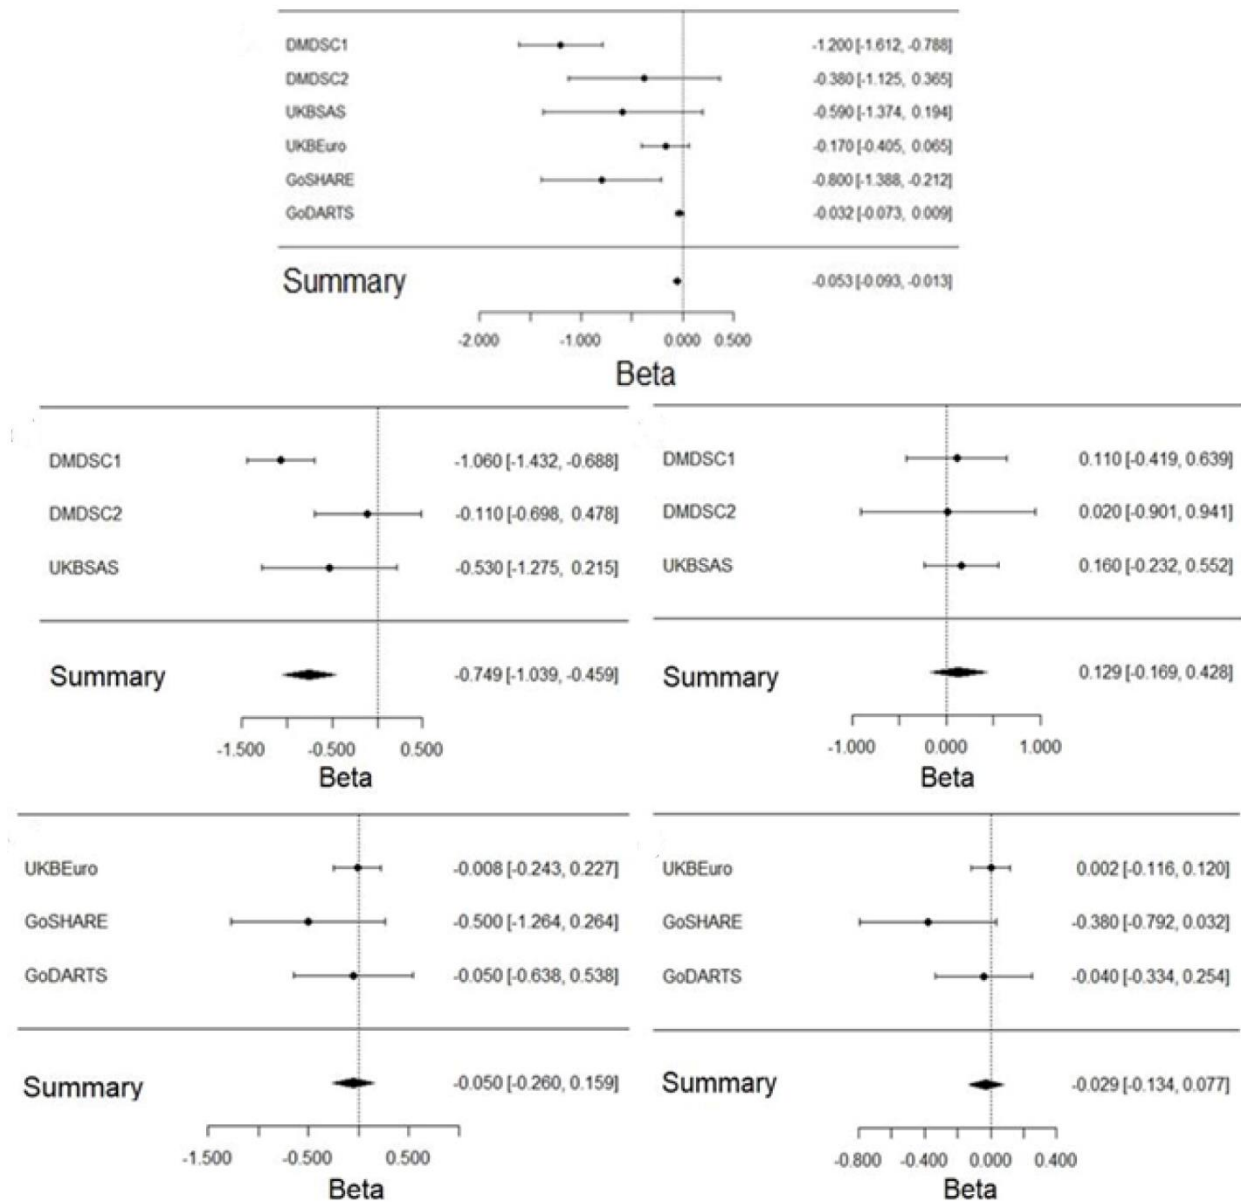

**Supplementary Figure S 9. Forest plot for the top significant SNP *rs9368219* near *CDKAL1* (Effect allele - T) in DMDSC Dr. Mohan Diabetes speciality Clinic, UKBSAS UK Biobank South Asians. GoDARTS, Genetics of Diabetes Audit and Research in Tayside Scotland; GoSHARE, Genetics of Scottish Health Research Register; UKBB Euro, United Kingdom Biobank Europeans. A) Overall meta-analysis of GWAS of Age onset of T2D; B) South Asian Indians with earlier onset of T2D (Age at diagnosis between 20 – 55 years); C) South Asian Indians with later onset of T2D (Age at diagnosis over 55 years); D) Europeans with earlier onset of T2D (Age at diagnosis between 20 – 55 years); E) Europeans with later onset of T2D (Age at diagnosis over 55 years)**

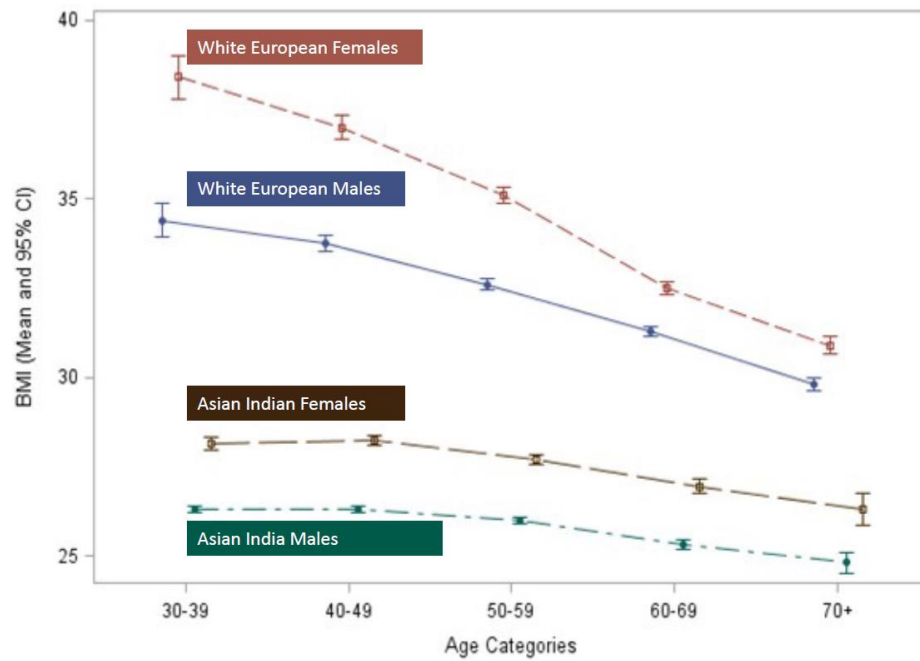

**Supplementary Figure S 10.** Females in squares and males in solid circles. White European males in blue solid circles with solid lines, females in red squares with dashed lines, South Indian males in green circles with dot dashed lines and females in brown squares with long dashed lines.

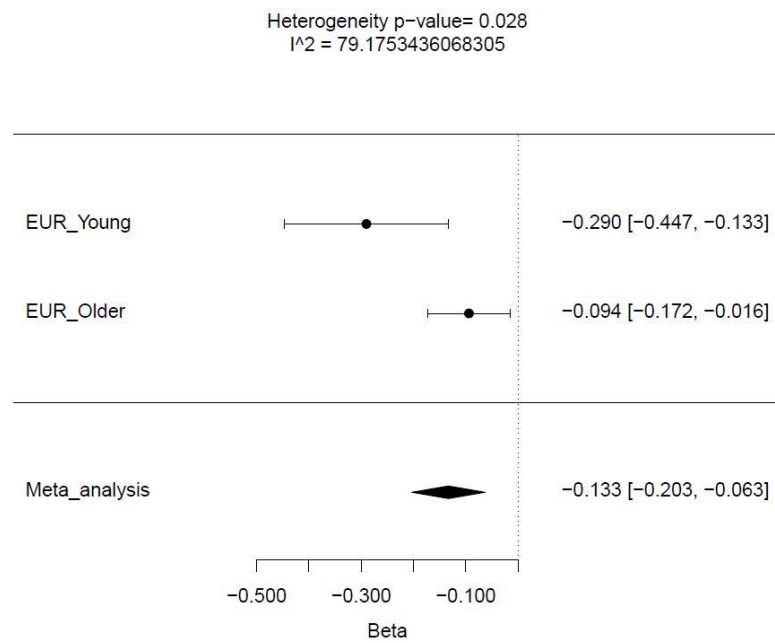

**Supplementary Figure S 11. Forest plot for the SNP rs7903146 near TCF7L2 (Effect allele - T)** Overall meta-analysis of Caucasians with earlier onset of T2D (Age at diagnosis between 20 – 55 years and later onset of T2D (Age at diagnosis over 55 years).



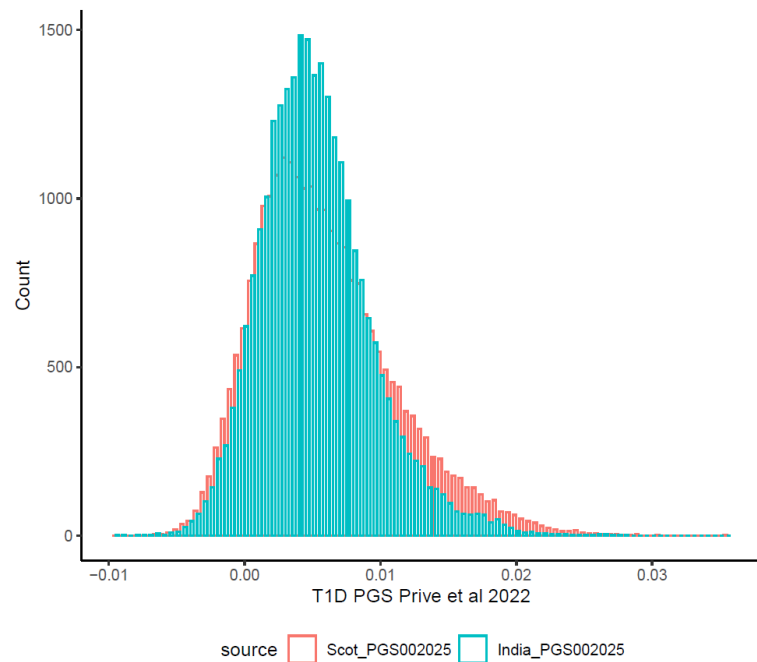

**Supplementary Figure S 12.** T1D Polygenic Score derived from PGS catalogue *Scottish in red, DMDSC in blue*

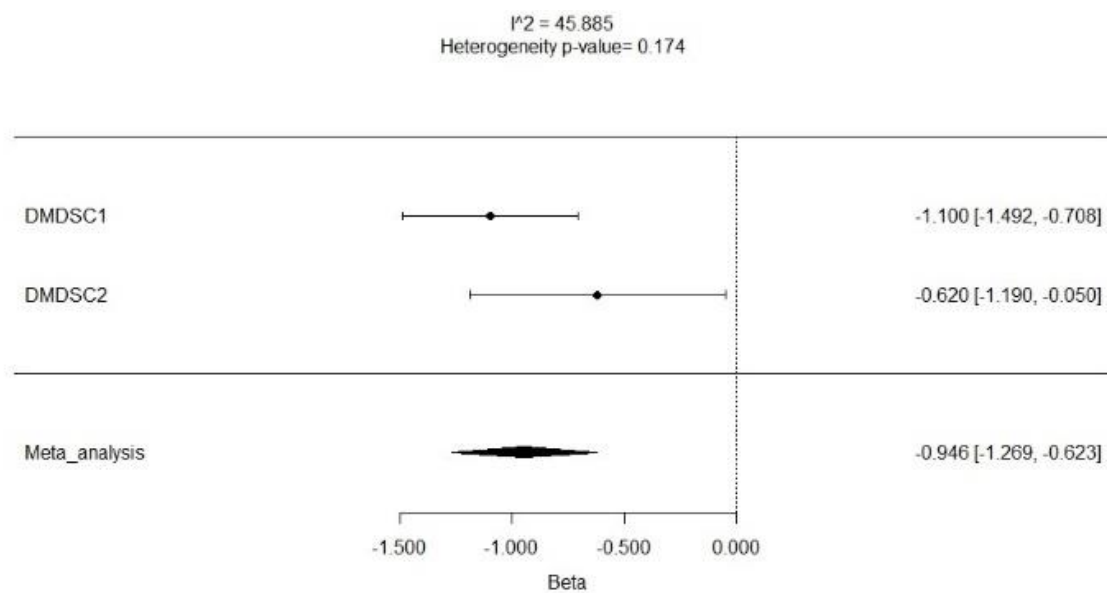

**Supplementary Figure S 13.** South Asian specific Meta Analysis of TCF7L2 without UKBB SAS
