# Supplementary material
Source: publisher figshare collection journal article supplement (https://diabetesjournals.figshare.com/articles/dataset/_/23063396)
Supplement: Supplementary file 1 [file 1]

## Sheet: TransmetaAAO
Locus	RSID	CHR	BP(hg19/GRch37)	Risk Allele	Other Allele	Risk Allele Frquency	P-value	Het_P-value	Beta
TCF7L2	rs7903146	10	114758349	T	C	0.3428	2.4e-12	0.007	-0.4338
CDKAL1	rs9368219	6	20674691	T	C	0.19	2.291e-08	0.0004	-0.057
SEC24B	rs76170449	4	110289592	A	T	0.03	1.79e-07	0.13	-1.89
WFS1	rs9998835	4	6293237	C	G	0.383	3.5e-07	0.07941	0.0351
IGF2BP2	rs7633675	3	185510613	T	G	0.6528	3.68e-07	0.0005397	0.0451
HAS2	rs3902292	8	123046516	A	G	0.48	7.2e-07	0.58	-0.08
DOP1A	rs371286318	6	371286318	T	C	0.019	1.03e-06	0.0003	-1.93
DIO2	rs191905784	14	80788987	A	G	0.998	1.05e-06	0.0004	0.005
TRPM8	rs28902187	2	234879428	T	G	0.097	1.415e-06	0.086	-0.613
ALPK2	rs35259614	18	56153463	A	G	0.79	1.54e-06	0.154	-0.097
FTO	rs55872725	16	53809123	T	C	0.411	1.69e-06	0.017	-0.0612
CDKN1C	rs458069	11	2858800	C	G	0.29	1.9e-06	0.51	0.07
MLX	rs684214	17	40696915	T	C	0.2953	2.4e-06	0.1111	-0.0403
NFAT5	rs862320	16	69651866	T	C	0.3814	3.26e-06	0.4311	0.033
TPSD1	rs1977100	16	1310921	G	A	0.64	3.4e-06	0.79	0.04
SOX2-OT	rs147427952	3	180910857	T	C	0.0019	3.46e-06	6e-05	-0.003
RAB18	rs2077345	10	27899128	T	C	0.948	6.01e-06	0.318	0.16
PSMD4	rs138543582	1	15122845	A	G	0.008	1.13e-05	0.73	-0.09
ZNF385D	rs17011243	3	22397185	G	A	0.002	1.13e-05	0.01	-1.12
CCDC91	rs11049587	12	28571023	A	C	0.004	1.25e-05	0.56	0.06
WDR11	rs11592107	10	122968964	A	G	0.3079	1.26e-05	0.3909	-0.0321
SIX3	rs12712928	2	45192080	C	G	0.16	1.5e-05	0.18	-0.41
SLC30A8	rs13266634	8	118184783	T	C	0.2915	2.46e-05	0.5618	0.0553
SLC26A4	rs67957258	7	107306899	T	C	0.95	2.5e-05	0.046	0.002
GRID1	rs11202004	10	86369107	T	C	0.199	2.53e-05	0.02	0.08
LPL	rs328	8	19819724	C	G	0.12	2.6e-05	0.36	-2.9
HNF1A	rs1800574	12	121416864	T	C	0.0294	2.91e-05	0.4873	-0.1565
ANKRD7	rs77517109	7	118962730	A	G	0.95	3.24e-05	0.65	0.21
FREM2	rs79184131	13	39223422	A	T	0.92	3.5e-05	0.07	0.86
CCDC174	rs144271503	3	14705879	A	G	0.9979	3.62e-05	2e-06	0.0456
ANKRD55	rs256904	5	55810305	A	T	0.2366	3.82e-05	0.3688	0.0404
HHEX	rs10882099	10	94460650	T	C	0.6147	4.514e-05	0.09552	-0.0595
CDC123	rs11257655	10	12307894	T	C	0.2193	5.16e-05	0.004444	-0.0696
C11orf85	rs2670909	11	64736173	C	G	0.63	5.511e-05	0.52	0.0692
DLGAP1	rs1372631	18	4026587	T	G	0.71	5.79e-05	0.97	0.074
CDKN2B	rs10811661	9	22134094	T	C	0.857	5.97e-05	0.03	-0.0589
KCNJ2	rs7503449	17	69066296	T	C	0.28	7.17e-05	0.94	0.006
LINGO2	rs1412234	9	28410683	T	C	0.65	7.35e-05	0.235	0.0583
SLC24A3	rs6136729	20	19420453	A	G	0.97	7.45e-05	0.83	0.85
MC4R	rs6567160	18	57829135	T	C	0.7639	7.799e-05	0.6219	0.0651
IKZF2	rs16849467	2	213818731	T	C	0.69	7.9e-05	0.2181	-0.0472
KCNQ1	rs234866	11	2857897	A	G	0.2982	8.89e-05	0.7613	0.0618
RAB11FIP4	rs75048991	17	29849129	A	G	0.17	9.4e-05	0.27	0.08

## Sheet: MetaAnalysis_SAS
Locus	RSID	CHR	BP(hg19/GRch37)	Risk Allele	Other Allele	Risk Allele Frquency	P-value	Het_P-value	Beta
SIX3	rs12712928	2	45192080	C	G	0.25	0.000203	0.28	-0.41
LPL	rs7819706	8	19844415	A	G	0.87	3.6e-05	0.86	-2.9
KCNK17	rs1535500	6	39284050	T	G	0.51	2.3e-05	0.98	-0.32
SEC24B	rs76170449	4	110289592	A	T	0.1	1.24e-05	0.33	-1.14
WDR11	rs3011366	10	122554701	G	A	0.09	2.46e-08	0.25	1.44
TCF7L2	rs7903146	10	114758349	T	C	0.34	1.8e-08	0.02	-0.72
CDKAL1	rs9368219	6	20674691	T	C	0.26	6.59e-08	0.002	-0.92
ZNF285D	rs17011243	3	22397185	A	G	0.004	2.45e-06	0.18	-5.5
TPSD1	rs1977100	16	1310921	A	G	0.54	3.6e-05	0.32	0.46
SPC25	rs2232328	2	169764546	G	C	0.03	2.3e-05	0.33	0.59
IGF5	rs2837187	21	41139573	A	G	0.42	0.00053	0.85	-0.14
FTO	rs55872725	16	53809123	T	C	0.34	7.7e-05	0.18	-0.37
SLC30A8	rs13266634	8	118184783	T	C	0.21	4.5e-05	0.56	0.37
CCND1	rs3918298	11	69463273	A	G	0.09	6.2e-05	0.16	0.99
CDKN2B	rs10811661	9	22134094	T	C	0.87	5.23e-05	0.09	-0.93

## Sheet: MetaAnalysi_EU
Locus	RSID	CHR	BP(hg19/GRch37)	Risk Allele	Other Allele	Risk Allele Frquency	P-value	Het_P-value	Beta
SPC25	rs2232328	2	169764546	G	C	0.09	2.36e-07	0.2	-0.14
HAS2	rs3902292	8	123046516	A	G	0.48	1.72e-06	0.77	-0.08
AOAH	rs4720207	7	36663785	A	C	0.13	2.86e-06	0.32	-0.11
IL2RB	rs12171227	22	37562467	A	G	0.13	5.01e-06	0.67	-0.1117
CCDC88C	rs61988449	14	91891058	A	G	0.24	5.98e-06	0.9	0.08
ZNF385D	rs2194607	3	21523342	A	G	0.64	7.31e-05	0.46	0.07
NDST1	rs78088236	5	149884917	C	G	0.1	9.7e-05	0.5	0.11
FTO	rs55872725	16	53809123	T	C	0.43	4.9e-05	0.43	-0.05
PDCD7	rs12438475	15	65420320	C	G	0.06	4.35e-05	0.44	0.06
ACAP2	rs862066	3	195175680	C	G	0.11	2.87e-05	0.67	0.1
MEIS1	rs9751172	2	66838439	T	C	0.85	2.51e-05	0.14	0.09
TNC	rs6478130	9	117827588	T	C	0.12	1.58e-05	0.12	0.1
NDFIP1	rs891984	5	141465404	A	T	0.06	1.35e-05	0.03	0.14
CCDC91	rs11049587	12	28571023	A	C	0.002	8.09e-05	0.45	0.06
HLA-DQB1-AS1	rs17843614	6	32620660	T	G	0.43	8.4e-05	0.1	0.07
